# Supplementary material
Source: PubMed Central journal article supplement (PMC4704585)
Supplement: supp_pp.15.01350_PP2015-01350R2_Supplemental_Material.pdf [file supp_pp.15.01350_PP2015-01350R2_Supplemental_Material.pdf]

## Tables

**Table S1.** Analysis of variance (ANOVA) of flowering time of the F<sub>2</sub> population *Ubi::HvCO2* x Igri grown under LD (16h light) conditions.

| Genetic variation <sup>1</sup>    | Explained variance % | Mean flowering time (days) <sup>2</sup> |        |              |              |              |              |
|-----------------------------------|----------------------|-----------------------------------------|--------|--------------|--------------|--------------|--------------|
|                                   |                      | S <sup>2</sup>                          | W      | S <u>x</u> S | S <u>x</u> W | W <u>x</u> S | W <u>x</u> W |
| <i>Ubi::HvCO2</i>                 | 16%***               | 60±21a                                  | 81±25b | -            | -            | -            | -            |
| <i>VRN-H1</i>                     | 11%***               | 59±18a                                  | 77±30b | -            | -            | -            | -            |
| <i>VRN-H2</i>                     | 51%***               | 32±7a                                   | 74±18b | -            | -            | -            | -            |
| <i>Ppd-H1</i>                     | 5%***                | 71±24a                                  | 63±23b | -            | -            | -            | -            |
| <i>Ubi::HvCO2</i> x <i>VRN-H1</i> | 1%***                | -                                       | -      | 55±16a       | 70±26b       | 75±14b       | 91±33c       |
| <i>Ubi::HvCO2</i> x <i>VRN-H2</i> | 1%***                | -                                       | -      | 30±6a        | 69±14b       | 38±9c        | 88±19d       |
| <i>Ubi::HvCO2</i> x <i>Ppd-H1</i> | 1%*                  | -                                       | -      | 66±21a       | 58±20b       | 90±27c       | 79±24c       |
| <i>VRN-H1</i> x <i>VRN-H2</i>     | 3%***                | -                                       | -      | 31±7a        | 67±11b       | 33±6a        | 91±18c       |

<sup>1</sup>) listed are significant single and pairwise interaction effects for variation in flowering time. <sup>2</sup>) Mean flowering time ± standard deviation of genotypes carrying alleles of the transgenic line in the background of spring barley Golden Promise (*Ubi::HvCO2* (GP)) or the winter barley Igri at the respective flowering locus.

S = spring barley *Ubi::HvCO2*, W= winter barley Igri, S x S, S x W, W x S and W x W interactions between alleles from *Ubi::HvCO2* (S) and Igri (W).

\*, \*\*, \*\*\* refer to significant effects at P<0.05, P<0.01 and P<0.001 respectively. Letters indicate significant differences between flowering time means at P<0.05.

**Table S2.** Analysis of variance (ANOVA) of flowering time of the spring/facultative subpopulation (genotypes without *VRN-H2*) of *Ubi::HvCO2* x Igri F<sub>2</sub> population grown under LD (16h light) conditions.

| Genetic variation <sup>1</sup> | Explained<br>variance % | Mean flowering time (days) <sup>2</sup> |      |
|--------------------------------|-------------------------|-----------------------------------------|------|
|                                |                         | S                                       | W    |
| <i>Ubi::HvCO2</i>              | 16%***                  | 30±6                                    | 38±9 |
| <i>VRN-H1</i>                  | ns                      |                                         |      |
| <i>Ppd-H1</i>                  | 65%***                  | 40±7                                    | 29±4 |

<sup>1</sup>Listed are significant factors for variation in flowering time in the spring and facultative F<sub>2</sub> *Ubi::HvCO2* x Igri plants. <sup>2</sup>Mean flowering time ± standard deviation of genotypes carrying alleles of the transgenic line in the background of spring barley line *Ubi::HvCO2* (S) or the winter barley Igri (W) at a the respective flowering locus. \*, \*\*, \*\*\* refer to significant effects at P<0.05, P<0.01 and P<0.001 respectively.

**Table S3.** Analysis of variance (ANOVA) for expression of flowering time genes in the F<sub>2</sub> population *Ubi::HvCO2* x Igri grown under LD (16h light) conditions. Expression analysis was performed on leaf samples taken two hours before the end of the light period at day 7 after emergence.

| Gene expression                      | <i>Ubi::HvCO2</i> | <i>HvFT1</i> | <i>VRN-H1</i> | <i>VRN-H2</i> | <i>Ppd-H1</i> |
|--------------------------------------|-------------------|--------------|---------------|---------------|---------------|
| <b>Genetic variation<sup>1</sup></b> |                   |              |               |               |               |
| <i>Ubi::HvCO2</i>                    | 72% ***           | 22% ***      | 11% ***       | 6% ***        | 24% ***       |
| <i>VRN-H1</i>                        | ns                | 8% **        | 22% ***       | 7% ***        | 5% *          |
| <i>VRN-H2</i>                        | ns                | 35% ***      | 14% ***       | 61% ***       | 16% ***       |
| <i>Ppd-H1</i>                        | ns                | 7% ***       | 4% *          | ns            | ns            |
| <i>Ubi::HvCO2</i> x <i>VRN-H1</i>    | ns                | ns           | 4% *          | ns            | ns            |
| <i>Ubi::HvCO2</i> x <i>VRN-H2</i>    | ns                | 2% *         | 4% **         | 15% ***       | ns            |
| <i>VRN-H1</i> x <i>VRN-H2</i>        | ns                | ns           | 13% ***       | 1% *          | ns            |
| <i>VRN-H2</i> x <i>Ppd-H1</i>        | ns                | 8% ***       | 3% *          | ns            | ns            |

<sup>1</sup>) Listed are significant genetic single and interaction effects for gene expression. \*, \*\*, \*\*\* refer to significant effects at P<0.05, P<0.01 and P<0.001 respectively. ns: no significant effect.

**Table S4.** Pearson correlation coefficients of flowering time (measured as days to heading) and expression levels of tested flowering genes in the F<sub>2</sub> population *Ubi::HvCO2* x Igri grown under LD (16h light) conditions. Expression analysis was performed on leaf samples taken two hours before the end of the light period at day 7 after emergence.

|                   | Days to Heading | <i>Ubi::HvCO2</i> | <i>HvFT1</i> | <i>VRN-H1</i> | <i>VRN-H2</i> | <i>Ppd-H1</i> | <i>HvFT3</i> |
|-------------------|-----------------|-------------------|--------------|---------------|---------------|---------------|--------------|
| <i>Ubi::HvCO2</i> | -0.58***        |                   |              |               |               |               |              |
| <i>HvFT1</i>      | -0.70***        | 0.37**            |              |               |               |               |              |
| <i>VRN-H1</i>     | -0.47***        | 0.41***           | 0.57***      |               |               |               |              |
| <i>VRN-H2</i>     | 0.38**          | 0.11              | -0.47***     | -0.28*        |               |               |              |
| <i>Ppd-H1</i>     | -0.59***        | 0.57***           | 0.33**       | 0.18          | -0.25*        |               |              |
| <i>HvFT3</i>      | -0.12           | 0.20              | 0.08         | -0.01         | -0.15         | 0.26*         |              |
| <i>HvCO1</i>      | 0.08            | -0.33**           | -0.08        | -0.09         | -0.07         | -0.05         | -0.10        |

\*, \*\*, \*\*\* refer to significant correlations at P<0.05, P<0.01 and P<0.001 respectively.

**Table S5.** Pearson correlation coefficients of flowering time (measured as days to heading) and expression levels of tested flowering genes in the spring/facultative (genotypes without *VRN-H2*, upper triangle) and winter (lower triangle) subpopulations of the F<sub>2</sub> population *Ubi::HvCO2* x Igri grown under LD (16h light) conditions. Expression analysis was performed on leaf samples taken two hours before the end of the light period at day 7 after emergence.

|                   | Days to Heading | <i>Ubi::HvCO2</i> | <i>HvFT1</i> | <i>VRN-H1</i> | <i>VRN-H2</i> | <i>Ppd-H1</i> | <i>HvFT3</i> | <i>HvCO1</i> |
|-------------------|-----------------|-------------------|--------------|---------------|---------------|---------------|--------------|--------------|
| Days to Heading   |                 | -0.23             | -0.59***     | -0.48**       | nd            | 0.30          | 0.54***      | 0.07         |
| <i>Ubi::HvCO2</i> | -0.47**         |                   | 0.08         | 0.37*         | nd            | 0.31          | 0.18         | -0.59***     |
| <i>HvFT1</i>      | nd              | nd                |              | 0.42**        | nd            | -0.26         | -0.16        | 0.00         |
| <i>VRN-H1</i>     | -0.80***        | 0.21              | nd           |               | nd            | -0.16         | -0.12        | -0.17        |
| <i>VRN-H2</i>     | -0.25           | 0.79***           | nd           | -0.15         |               | nd            | nd           | nd           |
| <i>Ppd-H1</i>     | -0.52**         | 0.60***           | nd           | 0.40*         | 0.37*         |               | 0.18         | -0.20        |
| <i>HvFT3</i>      | -0.01           | -0.13             | nd           | 0.06          | -0.05         | -0.16         |              | -0.19        |
| <i>HvCO1</i>      | -0.05           | -0.26             | nd           | -0.09         | -0.18         | 0.17          | -0.12        |              |

\*, \*\*, \*\*\* refer to significant correlations at P<0.05, P<0.01 and P<0.001 respectively. nd: not determined (no expression of *VRN-H2* and *HvFT1* in the spring/facultative and winter subpopulation, respectively).

**Table S6.** Analysis of variance (ANOVA) of *HvFT1* expression and flowering time of the F<sub>2</sub> population *Ubi::HvCO2* x Igri grown under SD conditions. Expression analysis was performed on leaf samples taken two hours before the end of the light period at day 75 after germination (day 25 after transfer from 8h to 10h SD).

| Genetic variation <sup>1</sup>    | Explained variance in <i>HvFT1</i> expression % | Explained variance in flowering time % | Mean flowering time (days) <sup>2</sup> |                      |              |              |              |              |
|-----------------------------------|-------------------------------------------------|----------------------------------------|-----------------------------------------|----------------------|--------------|--------------|--------------|--------------|
|                                   |                                                 |                                        | S                                       | W                    | S <u>x</u> S | S <u>x</u> W | W <u>x</u> S | W <u>x</u> W |
| <i>Ubi::HvCO2</i>                 | 16% ***                                         | 48% ***                                | 111±45a                                 | 200±0 <sup>3</sup> b | -            | -            | -            | -            |
| <i>VRN-H1</i>                     | 4% **                                           | 4% ***                                 | 126±54a                                 | 147±52b              | -            | -            | -            | -            |
| <i>VRN-H2</i>                     | 29% ***                                         | 11% ***                                | 89±42a                                  | 145±51b              | -            | -            | -            | -            |
| <i>Ppd-H1</i>                     | 5% **                                           | 3% ***                                 | 144±57a                                 | 128±53b              | -            | -            | -            | -            |
| <i>Ubi::HvCO2</i> x <i>VRN-H2</i> | 4% **                                           | 1% ***                                 | -                                       | -                    | 74±8a        | 125±45b      | 200±0c       | 200±0c       |
| <i>VRN-H1</i> x <i>VRN-H2</i>     | 5% **                                           | ns                                     |                                         |                      |              |              |              |              |
| <i>VRN-H1</i> x <i>HvFT3</i>      | 4% **                                           | ns                                     |                                         |                      |              |              |              |              |
| <i>VRN-H2</i> x <i>Ppd-H1</i>     | ns                                              | 2% *                                   | -                                       | -                    | 95±52a       | 87±39a       | 164±47b      | 140±51c      |

<sup>1</sup>) listed are significant single and interaction effects for flowering time and *HvFT1* expression. <sup>2</sup>) Mean flowering time ± standard deviation of genotypes carrying alleles of the transgenic line in the background of *Ubi::HvCO2* (S) or the winter barley Igri (W) or a combination of spring (S) and winter (W) alleles at interacting flowering time loci. <sup>3</sup>) Genotypes that did not flower until the end of the experiment at 200 DAE were given a flowering time score of 200. \*, \*\*, \*\*\* refer to significant effects at P<0.05, P<0.01 and P<0.001 respectively. ns: no significant effect. Letters indicate significant differences between the means at P<0.05.

**Table S7.** List of primers used in this study.

| <b>Fwd primer name</b>            | <b>Rev primer name</b>     | <b>Forward primer sequence</b> | <b>Reverse primer sequence</b> | <b>Purpose</b>      | <b>Reference</b>            |
|-----------------------------------|----------------------------|--------------------------------|--------------------------------|---------------------|-----------------------------|
| <b>HvCO1_2216F</b>                | HvCO1_3589R                | CAACAACAGCATATCTTTCTCA         | TCAGAACCATGGGACAGTACTGTAG      | Transformant screen | Campoli et al., 2012a       |
| <b>HvCO2_tg_1F</b>                | Nos_tg_1R                  | TTCACTTCAGATGCCAGTGC           | ATCTGCAGGTCGAACGGTAT           | Transformant screen | Campoli et al., unpublished |
| <b>Vec8_F1</b>                    | Vec8_R1                    | GCGCGCGATAATTTAGTCTTAGTTTGCG   | ACGCGGATTCGGCTCCAACAATG        | Transformant screen | Campoli et al., 2012a       |
| <b>VRN-H1_A_F (winter allele)</b> | VRN-H1_S_R (winter allele) | TTC ATC ATG GAT CGC CAG TA     | AAA GCT CCT GCC AAC TAC GA     | Genotyping          | Hemming et al., 2009        |
| <b>VRN-H1_B_F (spring allele)</b> | VRN-H1_T_R (spring allele) | GCT CCA GCT GAT GAA ACT CC     | CTT CAT GGT TTT GCA AGC TCC    | Genotyping          | Hemming et al., 2009        |
| <b>VRN-H2_HvZCCTab_1F</b>         | VRN-H2_HvZCCTab_1R         | CCTAGTTAAAACATATATCCATAGAGC    | GATCGTTGCGTTGCTAATAGTG         | Genotyping          | Szucs et al., 2006          |
| <b>PPD-H1_2683F (HRM)</b>         | PPD-H1_2774R (HRM)         | CCAGTGTTGTCAATCCTTG            | GCTCCC GTTATTGGTGTGTGT         | Genotyping          | Campoli et al., 2012a       |
| <b>HvFT3_F4 (winter allele)</b>   | HvFT3_R1                   | GGATGGATCGGATTATTATTGTATG      | CTGCACATTATTTGTGATGCAA         | Genotyping          | Kikuchi et al., 2009        |
| <b>HvFT3_F2 (spring allele)</b>   | HvFT3_R1                   | AAGGCTGTTAATTGGTAGTCTCC        | CTGCACATTATTTGTGATGCAA         | Genotyping          | Kikuchi et al., 2009        |
| <b>HvACT_591F</b>                 | HvACT_789R                 | CGTGTTGGATTCTGGTGATG           | AGCCACATATGCGAGCTTCT           | Expression analysis | Campoli et al., 2012a       |
| <b>HvCO1_2216F</b>                | HvCO1_3564R                | CAACAACAGCATATCTTTCTCA         | CTACTGTCAGATAGGGCCGCA          | Expression analysis | Campoli et al., 2012a       |
| <b>HvCO2_564F</b>                 | HvCO2_721R                 | AGTGGACTCTTGGCTCCTCA           | CATGCTGCTGTTCTTGCATT           | Expression analysis | Campoli et al., 2012a       |
| <b>HvBM5A_292F (VRN-HI)</b>       | HvBM5A_494R (VRN-HI)       | CTGAAGGCGAAGGTTGAGAC           | TTCTCCTCCTGCAGTGACCT           | Expression analysis | Campoli et al., 2012a       |

| <b>Fwd primer name</b> | <b>Rev primer name</b> | <b>Forward primer sequence</b> | <b>Reverse primer sequence</b> | <b>Purpose</b>      | <b>Reference</b>            |
|------------------------|------------------------|--------------------------------|--------------------------------|---------------------|-----------------------------|
| <b>HvFT1_1955F</b>     | HvFT1_2183R            | GGTAGACCCAGATGCTCCAA           | CAGGAGGTGATGTGCTACGA           | Expression analysis | Campoli et al., 2012a       |
| <b>VRN-H2_1847F</b>    | VRN-H2_1985R           | CCGCTACGAGTCCAGAAAAG           | GAACCATCCGAGGTGAAGTT           | Expression analysis | Campoli et al., unpublished |
| <b>Ppd-H1_2165F</b>    | Ppd-H1_2336R           | GATGGATTCAAAGGCAAGGA           | GAACAATTGGCTCCTCCAAA           | Expression analysis | Campoli et al., 2012b       |
| <b>HvFT3_1026F</b>     | HvFT3_1888R            | TGGTGCCAGCTTTGTTTATGAAAGA      | CTACTCCCCTTGAGAACTTTC          | Expression analysis | Campoli et al., 2012a       |



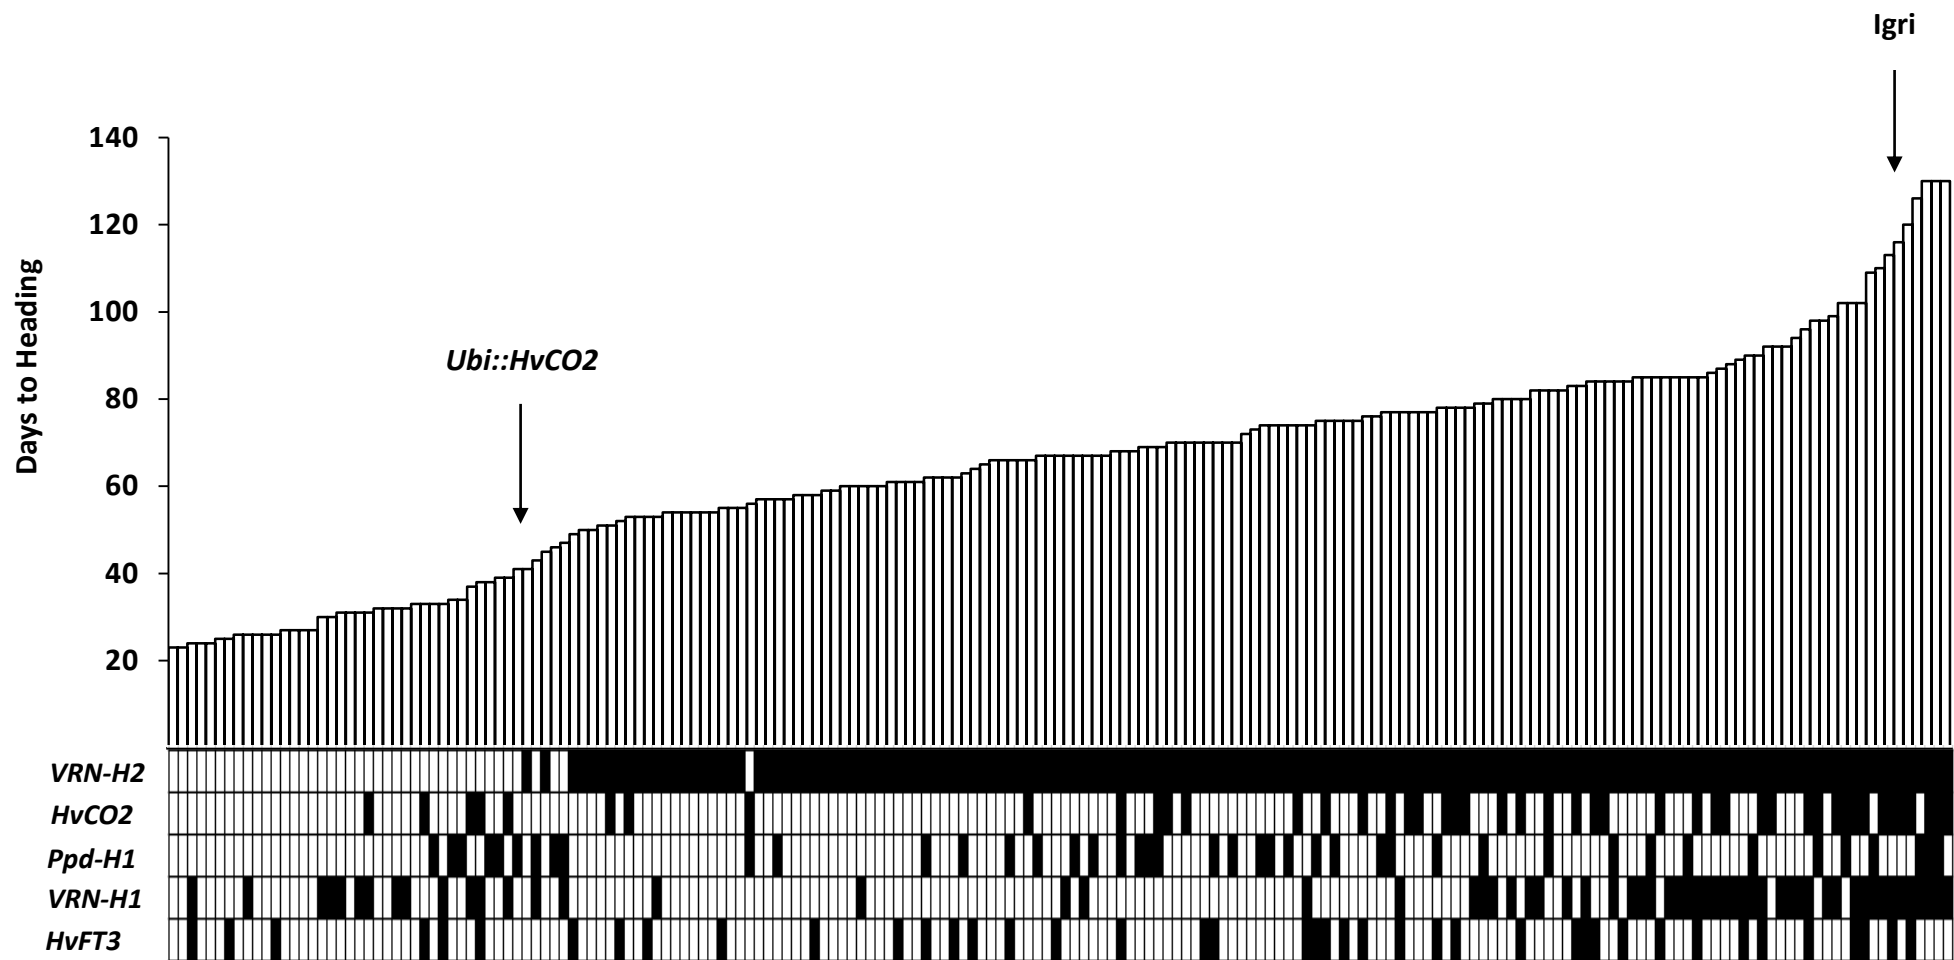

**Figure S1: Flowering time of the F<sub>2</sub> population *Ubi::HvCO2* x *Igri* under long-day (LD) conditions.**

Flowering time of the F<sub>2</sub> population *Ubi::HvCO2* x *Igri* in relation to the allelic variation at five main flowering loci: *VRN-H2*, *VRN-H1*, *Ubi::HvCO2*, *Ppd-H1* and *HvFT3*. Hundred and ninety-one F<sub>2</sub> genotypes derived from the cross *Ubi::HvCO2* x *Igri* were grown under LD conditions (16h light) without vernalization. The flowering time of plants was measured in days from germination until heading.

Each bar represents flowering time of one F<sub>2</sub> line. The genotypes are arranged according to their flowering time. Average flowering time of the two parental genotypes is indicated by arrows. Allelic variation at major flowering loci is coded in black and white for each line in the population. Homozygote and heterozygote dominant alleles accelerating flowering time are represented by white boxes, whereas homozygote and heterozygote dominant alleles delaying flowering time are represented by black boxes.

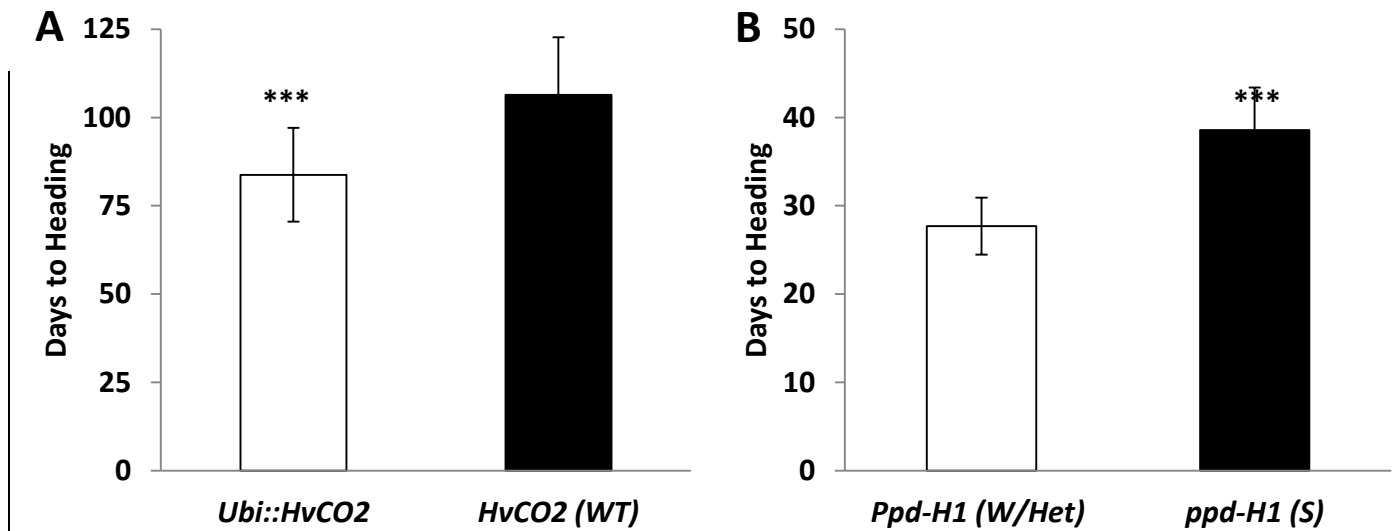

**Figure S2: Effects of *Ubi::HvCO2* and *Ppd-H1* on flowering time in A) F<sub>2</sub> genotypes with a winter background (winter alleles at *VRN-H1* and *VRN-H2*) and B) transgenic F<sub>2</sub> genotypes with a spring or facultative background (with a deletion of the *VRN-H2* locus) grown under LD conditions.**

Columns represent the average flowering time of (A) F<sub>2</sub> genotypes with a winter background (winter alleles at *VRN-H1* and *VRN-H2*) classified according to the presence/absence of *Ubi::HvCO2*, and of (B) transgenic F<sub>2</sub> genotypes with a spring or facultative background (with a deletion of the *VRN-H2* locus) classified according to allelic variation at *Ppd-H1*. W/Het: homozygous and heterozygous winter allele, S: spring allele. Error bars: standard deviation. \*\*\* refers to a significant difference at p<0.001.

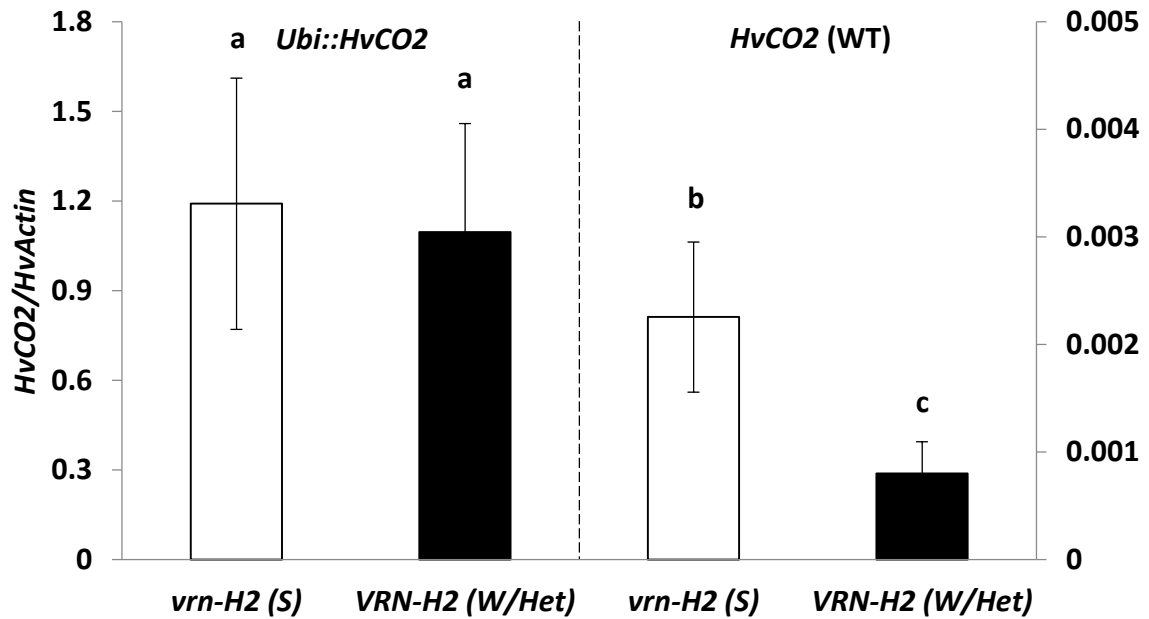

**Figure S3: Effects of *VRN-H2* on expression of *HvCO2* in the F<sub>2</sub> population *Ubi::HvCO2* x *Igri* under LD conditions.**

Columns represent the average expression of *HvCO2* normalized to *HvActin* in F<sub>2</sub> genotypes lines classified according to the presence/absence of *Ubi::HvCO2* and *VRN-H2*. S: spring allele, W/Het: homozygous and heterozygous winter allele. Expression analysis was performed on leaf samples collected two hours before the end of the light period in long day (LD, 16h light) at day 7 after germination. Error bars: standard deviation. Letters on top of each graph indicate significant differences in expression levels at p<0.05.

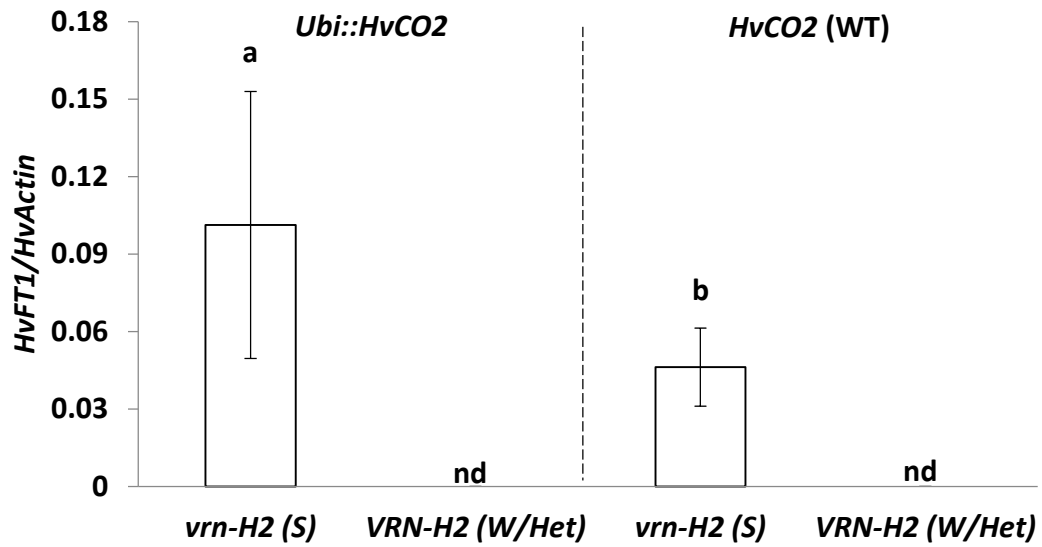

**Figure S4: Effects of *Ubi::HvCO2* and *VRN-H2* on expression of *HvFT1* in the F<sub>2</sub> population *Ubi::HvCO2* x *Igri* under LD conditions.**

Columns represent the average expression of *HvFT1* normalized to *HvActin* in F<sub>2</sub> genotypes lines classified according to the presence/absence of *Ubi::HvCO2* and *VRN-H2*. S: spring allele, W/Het: homozygous and heterozygous winter allele. Expression analysis was performed on leaf samples collected two hours before the end of the light period in long day (LD, 16h light) at day 7 after germination. nd: no expression detected. Error bars: standard deviation. Letters on top of each graph indicate significant differences in expression levels at  $p < 0.05$ .

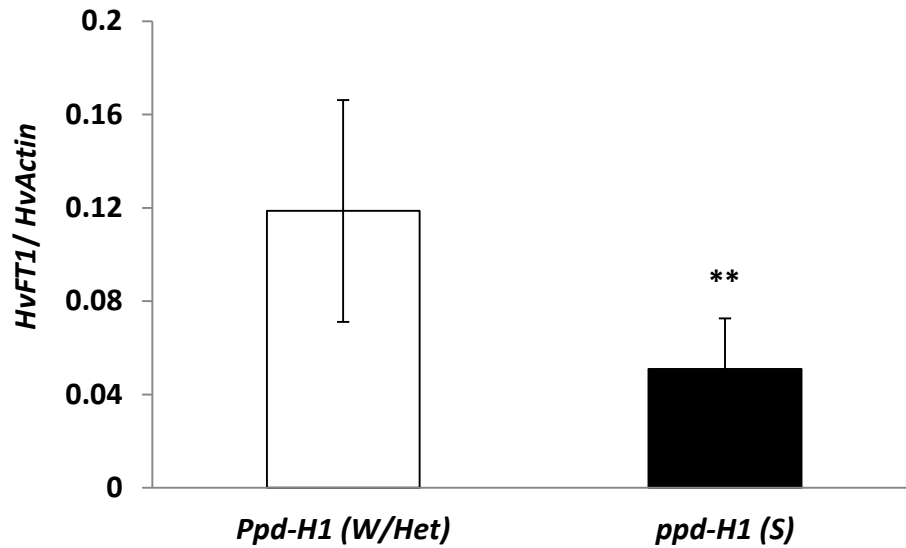

**Figure S5: Effect of *Ppd-H1* on expression levels of *HvFT1* in transgenic spring/facultative F<sub>2</sub> genotypes *Ubi::HvCO2* x Igri under LD conditions.**

Effect of *Ppd-H1* on *HvFT1* expression levels in *Ubi::HvCO2* x Igri F<sub>2</sub> genotypes selected to carry the transgene *Ubi::HvCO2* and homozygous for the spring allele at *VRN-H2*. Columns represent the average expression levels of *HvFT1* normalized to *HvActin* in F<sub>2</sub> genotypes classified according to allelic variation at *Ppd-H1*. W/Het: homozygous and heterozygous winter allele, S: spring allele. Expression analysis was performed on leaf samples taken two hours before the end of the light period in long day (LD, 16h light) at day 7 after germination. Error bars: standard deviation. \*\* refers to a significant difference at P<0.01.

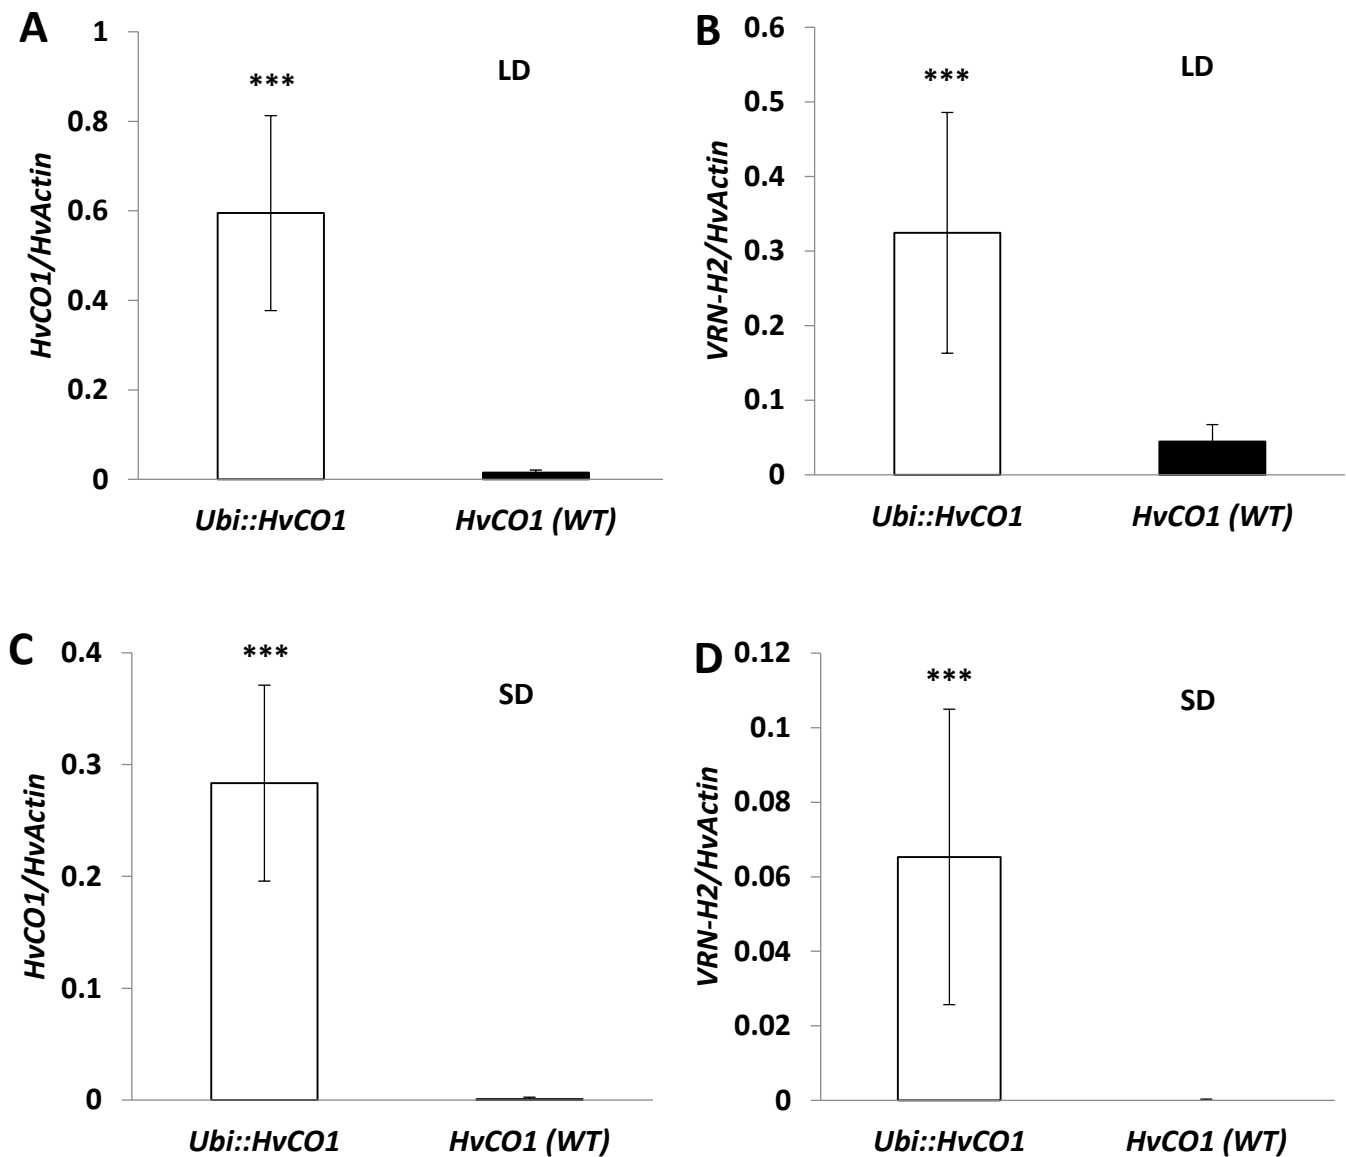

**Figure S6: Effects of *Ubi::HvCO1* on expression of *HvCO1* and *VRN-H2* in  $F_2$  genotypes of the population *Ubi::HvCO1* x *Igri* grown under LD and SD conditions.**

Columns represent the average expression of *HvCO1* (**A**, **C**) and *VRN-H2* (**B**, **D**), normalized to *HvActin* in  $F_2$  genotypes lines-classified according to the presence/absence of the transgene *Ubi::HvCO1*, under long-day (LD, 16h light, **A**, **B**) and short-day (SD, 8h light, **C**, **D**) conditions.  $F_2$  genotypes lines-with the deleted *VRN-H2* locus were not considered in **B** and **D**. Expression analysis was performed on leaf samples collected two hours before the end of the light period at day 22 and 11 after germination under LD and SD, respectively. Error bars: standard deviation. \*\*\* refers to a significant difference at  $p < 0.001$ .

## References

- Campoli C, Drosse B, Searle I, Coupland G, von Korff M (2012a) Functional characterisation of *HvCOI*, the barley (*Hordeum vulgare*) flowering time ortholog of *CONSTANS*. *Plant J* 69:868–880
- Campoli C, Shtaya M, Davis SJ, von Korff M (2012b) Expression conservation within the circadian clock of a monocot: natural variation at barley *Ppd-H1* affects circadian expression of flowering time genes, but not clock orthologs. *BMC Plant Biol* 12:97
- Hemming MN, Fieg S, Peacock WJ, Dennis ES, Trevaskis B (2009) Regions associated with repression of the barley (*Hordeum vulgare*) *VERNALIZATION1* gene are not required for cold induction. *Mol Genet Genomics*. 282(2):107-117
- Kikuchi R, Kawahigashi H, Ando T, Tonooka T, Handa H (2009) Molecular and functional characterization of PEBP genes in barley reveal the diversification of their roles in flowering. *Plant Physiol*. 149(3):1341-1353
- Szücs P, Karsai I, von Zitzewitz J, Mészáros K, Cooper LLD, Gu YQ, Chen THH, Hayes PM, Skinner JS (2006) Positional relationships between photoperiod response QTL and photoreceptor and vernalization genes in barley. *Theor Appl Genet* 112:1277–1285
